# Supplementary material
Source: PubMed Central journal article supplement (PMC2734146)
Supplement: msp070_1.pdf [file msp070_1.pdf]

# Supplementary Material for Zhou et al., Translationally optimal codons associate with structurally sensitive sites in proteins

Table S1: Codon optimality ( $C_{\text{opt}}$ ) and corresponding odds ratio ( $O_{\text{buried}}$ ) of use frequency between buried and exposed sites

| Amino acid | Codon | <i>E. coli</i>   |                     | <i>S. cerevisiae</i> |                     | <i>D. melanogaster</i> |                     | <i>M. musculus</i> |                     |
|------------|-------|------------------|---------------------|----------------------|---------------------|------------------------|---------------------|--------------------|---------------------|
|            |       | $C_{\text{opt}}$ | $O_{\text{buried}}$ | $C_{\text{opt}}$     | $O_{\text{buried}}$ | $C_{\text{opt}}$       | $O_{\text{buried}}$ | $C_{\text{opt}}$   | $O_{\text{buried}}$ |
| Ala        | GCT   | 1.717            | 0.925               | 3.919                | 1.044               | 0.868                  | 1.003               | 1.033              | 1.009               |
|            | GCC   | 0.639            | 0.974               | 1.318                | 1.001               | 1.351                  | 1.129               | 1.041              | 1.059               |
|            | GCA   | 0.986            | 0.951               | 0.150                | 0.950               | 0.763                  | 0.884               | 0.960              | 0.952               |
|            | GCG   | 0.900            | 1.120               | 0.122                | 0.978               | 0.912                  | 0.896               | 0.905              | 0.938               |
| Arg        | CGT   | 2.934            | 1.069               | 1.554                | 1.169               | 1.090                  | 1.093               | 1.159              | 1.103               |
|            | CGC   | 1.189            | 0.941               | 0.157                | 0.800               | 1.624                  | 0.964               | 1.092              | 1.050               |
|            | CGA   | 0.276            | 1.040               | 0.042                | 0.917               | 0.668                  | 1.044               | 1.205              | 1.076               |
|            | CGG   | 0.210            | 1.007               | 0.040                | 1.030               | 1.135                  | 0.941               | 1.137              | 1.020               |
| Asn        | AGA   | 0.144            | 0.976               | 4.273                | 1.005               | 0.493                  | 0.992               | 0.782              | 0.913               |
|            | AGG   | 0.153            | 0.940               | 0.122                | 0.964               | 0.878                  | 0.960               | 0.859              | 0.906               |
|            | AAT   | 0.271            | 0.774               | 0.193                | 0.933               | 0.562                  | 0.911               | 0.866              | 0.874               |
|            | AAC   | 3.693            | 1.292               | 5.188                | 1.072               | 1.781                  | 1.098               | 1.154              | 1.144               |
| Asp        | GAT   | 0.455            | 0.945               | 0.485                | 1.130               | 0.714                  | 1.082               | 0.934              | 0.913               |
|            | GAC   | 2.198            | 1.058               | 2.061                | 0.885               | 1.401                  | 0.924               | 1.070              | 1.095               |
| Cys        | TGT   | 0.622            | 1.013               | 3.671                | 1.255               | 0.662                  | 1.049               | 0.944              | 0.979               |
|            | TGC   | 1.608            | 0.987               | 0.272                | 0.797               | 1.510                  | 0.953               | 1.060              | 1.022               |
| Gln        | CAA   | 0.507            | 0.855               | 6.547                | 1.039               | 0.582                  | 0.969               | 0.804              | 0.832               |
|            | CAG   | 1.972            | 1.170               | 0.153                | 0.962               | 1.718                  | 1.032               | 1.245              | 1.202               |
| Glu        | GAA   | 1.331            | 1.080               | 4.168                | 1.051               | 0.544                  | 0.978               | 0.855              | 0.949               |
|            | GAG   | 0.751            | 0.926               | 0.240                | 0.951               | 1.838                  | 1.023               | 1.169              | 1.054               |
| Gly        | GGT   | 1.840            | 1.089               | 10.496               | 1.404               | 0.957                  | 1.107               | 1.018              | 1.013               |
|            | GGC   | 1.474            | 0.955               | 0.304                | 0.766               | 1.206                  | 0.981               | 1.060              | 1.092               |
|            | GGA   | 0.234            | 0.905               | 0.120                | 0.759               | 0.901                  | 0.958               | 0.888              | 0.950               |
|            | GGG   | 0.327            | 1.008               | 0.111                | 1.037               | 0.785                  | 0.914               | 1.040              | 0.939               |
| His        | CAT   | 0.381            | 0.973               | 0.281                | 1.027               | 0.694                  | 1.064               | 0.909              | 0.934               |
|            | CAC   | 2.622            | 1.028               | 3.561                | 0.974               | 1.441                  | 0.940               | 1.100              | 1.071               |
| Ile        | ATT   | 0.539            | 1.008               | 1.261                | 1.126               | 0.763                  | 0.957               | 0.937              | 1.058               |
|            | ATC   | 3.406            | 1.036               | 2.669                | 0.959               | 1.788                  | 1.152               | 1.248              | 1.081               |
| Leu        | ATA   | 0.130            | 0.876               | 0.108                | 0.867               | 0.567                  | 0.835               | 0.736              | 0.808               |
|            | CTT   | 0.542            | 0.891               | 0.280                | 1.029               | 0.682                  | 1.002               | 0.950              | 0.960               |
|            | CTC   | 0.744            | 0.855               | 0.146                | 0.931               | 1.235                  | 1.045               | 1.004              | 1.041               |
|            | CTA   | 0.285            | 0.975               | 0.619                | 0.979               | 0.791                  | 0.891               | 0.950              | 0.952               |
|            | CTG   | 3.759            | 1.117               | 0.286                | 0.959               | 1.488                  | 1.103               | 1.093              | 1.070               |
|            | TTA   | 0.301            | 1.017               | 0.676                | 0.938               | 0.475                  | 0.920               | 0.868              | 0.895               |
| Lys        | TTG   | 0.527            | 1.031               | 4.625                | 1.098               | 0.772                  | 0.904               | 0.972              | 0.971               |
|            | AAA   | 1.136            | 1.040               | 0.208                | 0.925               | 0.506                  | 1.093               | 0.799              | 0.924               |
| Phe        | AAG   | 0.881            | 0.962               | 4.811                | 1.081               | 1.975                  | 0.915               | 1.252              | 1.082               |
|            | TTT   | 0.285            | 0.995               | 0.251                | 0.930               | 0.526                  | 0.860               | 0.906              | 0.943               |
| Pro        | TTC   | 3.510            | 1.005               | 3.985                | 1.075               | 1.902                  | 1.163               | 1.104              | 1.060               |
|            | CCT   | 0.526            | 0.957               | 0.423                | 0.890               | 0.714                  | 0.854               | 1.053              | 0.984               |
|            | CCC   | 0.278            | 0.977               | 0.144                | 1.001               | 1.262                  | 1.077               | 0.998              | 1.136               |
|            | CCA   | 0.737            | 1.009               | 6.153                | 1.085               | 0.864                  | 1.139               | 0.991              | 0.905               |
| Ser        | CCG   | 2.883            | 1.033               | 0.126                | 1.059               | 1.083                  | 0.901               | 0.913              | 0.971               |
|            | TCT   | 2.360            | 1.224               | 2.819                | 1.109               | 0.686                  | 1.041               | 0.983              | 1.083               |
|            | TCC   | 2.142            | 1.213               | 2.565                | 1.135               | 1.113                  | 1.202               | 1.057              | 1.205               |
|            | TCA   | 0.418            | 1.038               | 0.331                | 1.019               | 0.712                  | 1.070               | 0.950              | 0.986               |
|            | TCG   | 0.581            | 1.216               | 0.191                | 1.062               | 1.198                  | 1.195               | 1.063              | 1.039               |
|            | AGT   | 0.343            | 0.888               | 0.364                | 0.803               | 0.688                  | 0.887               | 0.952              | 0.838               |
| Thr        | AGC   | 1.086            | 0.682               | 0.413                | 0.717               | 1.329                  | 0.671               | 1.018              | 0.880               |
|            | ACT   | 1.963            | 0.943               | 2.056                | 1.035               | 0.586                  | 0.970               | 0.909              | 0.972               |
|            | ACC   | 1.886            | 1.191               | 2.640                | 0.963               | 1.862                  | 1.065               | 1.106              | 1.124               |
|            | ACA   | 0.293            | 0.849               | 0.196                | 1.018               | 0.601                  | 1.082               | 0.983              | 0.970               |
| Tyr        | ACG   | 0.413            | 0.929               | 0.126                | 0.971               | 1.099                  | 0.887               | 0.988              | 0.882               |
|            | TAT   | 0.348            | 1.093               | 0.230                | 0.916               | 0.558                  | 1.059               | 0.944              | 0.932               |
|            | TAC   | 2.876            | 0.915               | 4.340                | 1.092               | 1.792                  | 0.944               | 1.060              | 1.073               |
| Val        | GTT   | 1.668            | 0.896               | 1.950                | 1.069               | 0.711                  | 0.894               | 0.910              | 0.914               |
|            | GTC   | 0.579            | 1.072               | 2.696                | 1.015               | 1.237                  | 1.005               | 1.026              | 1.008               |
|            | GTA   | 1.221            | 0.934               | 0.135                | 0.930               | 0.640                  | 0.899               | 0.915              | 0.922               |
|            | GTG   | 0.707            | 1.100               | 0.221                | 0.936               | 1.225                  | 1.117               | 1.079              | 1.098               |

Table S2: List of optimal codons

| Amino acid | <i>E. coli</i> | <i>S. cerevisiae</i> | <i>D. melanogaster</i> | <i>M. musculus</i> |
|------------|----------------|----------------------|------------------------|--------------------|
| Ala        | GCT            | GCT, GCC             | GCC                    | -                  |
| Arg        | CGT, CGC       | CGT, AGA             | CGC                    | CGT, CGC, CGA, CGG |
| Asn        | AAC            | AAC                  | AAC                    | AAC                |
| Asp        | GAC            | GAC                  | GAC                    | GAC                |
| Cys        | TGC            | TGT                  | TGC                    | -                  |
| Gln        | CAG            | CAA                  | CAG                    | CAG                |
| Glu        | GAA            | GAA                  | GAG                    | GAG                |
| Gly        | GGT, GGC       | GGT                  | GGC                    | GGC                |
| His        | CAC            | CAC                  | CAC                    | CAC                |
| Ile        | ATC            | ATT, ATC             | ATC                    | ATC                |
| Leu        | CTG            | TTG                  | CTC, CTG               | CTG                |
| Lys        | -              | AAG                  | AAG                    | AAG                |
| Phe        | TTC            | TTC                  | TTC                    | TTC                |
| Pro        | CCG            | CCA                  | CCC                    | CCT                |
| Ser        | TCT, TCC       | TCT, TCC             | TCC, TCG, AGC          | TCC                |
| Thr        | ACT, ACC       | ACT, ACC             | ACC                    | ACC                |
| Tyr        | TAC            | TAC                  | TAC                    | -                  |
| Val        | GTT, GTA       | GTT, GTC             | GTC, GTG               | GTG                |

Table S3: Odds ratio of optimal codon usage between buried and exposed sites, for different solvent accessibility cutoffs

| AA      | <i>E. coli</i> |          |           | <i>S. cerevisiae</i> |          |           | <i>D. melanogaster</i> |           |           | <i>M. musculus</i> |           |           |
|---------|----------------|----------|-----------|----------------------|----------|-----------|------------------------|-----------|-----------|--------------------|-----------|-----------|
|         | 5%             | 15%      | 35%       | 5%                   | 15%      | 35%       | 5%                     | 15%       | 35%       | 5%                 | 15%       | 35%       |
| Ala     | 0.94           | 0.96     | 0.90*(*)  | 1.04                 | 1.04     | 1.06      | 1.12***                | 1.13***   | 1.15***   | —                  | —         | —         |
| Arg     | 1.18           | 1.06     | 1.03      | 1.46*(*)             | 1.23(*)  | 1.28**(*) | 1.03                   | 1.02      | 0.89**    | 1.26***            | 1.13**    | 1.22***   |
| Asn     | 1.60***        | 1.45***  | 1.29***   | 0.94                 | 1.02     | 1.04      | 1.05                   | 1.09      | 1.06      | 1.25***            | 1.19***   | 1.16***   |
| Asp     | 1.07           | 1.12*(*) | 1.06      | 0.79*(*)             | 0.89     | 0.89(*)   | 0.93                   | 0.90*     | 0.93(*)   | 1.12**(*)          | 1.10**    | 1.10**(*) |
| Cys     | 1.04           | 1.01     | 1.12      | 1.35*(*)             | 1.45*(*) | 1.25      | 1.03                   | 1.00      | 0.89      | —                  | —         | —         |
| Gln     | 1.35***        | 1.24***  | 1.18**(*) | 0.96                 | 1.01     | 1.04      | 0.98                   | 1.08      | 1.01      | 1.42***            | 1.28***   | 1.20***   |
| Glu     | 1.11           | 1.10     | 1.09*     | 1.10                 | 1.04     | 1.06      | 0.97                   | 1.01      | 1.02      | 1.09               | 1.08*     | 1.06*     |
| Gly     | 1.04           | 1.07     | 1.05      | 1.64***              | 1.49***  | 1.47***   | 1.03                   | 1.01      | 0.99      | 1.13***            | 1.12***   | 1.08**    |
| His     | 1.14           | 1.06     | 1.06      | 1.04                 | 1.01     | 0.92      | 0.86(*)                | 0.97      | 0.95      | 1.09               | 1.11*     | 1.11*     |
| Ile     | 0.99           | 1.04     | 1.04      | 1.08                 | 1.16*(*) | 1.17      | 1.01                   | 1.12**(*) | 1.30***   | 1.10**(*)          | 1.11**(*) | 1.10*     |
| Leu     | 1.10***        | 1.12***  | 1.10*     | 1.03                 | 1.08     | 1.12      | 1.09*(*)               | 1.08*(*)  | 1.13**    | 1.00               | 1.06*     | 1.05*(*)  |
| Lys     | —              | —        | —         | 1.07                 | 1.12     | 1.05      | 1.07                   | 0.93      | 0.93      | 1.08               | 1.14**    | 1.10**(*) |
| Phe     | 1.06           | 1.04     | 0.99      | 1.02                 | 1.13     | 1.01      | 1.28***                | 1.15*(*)  | 1.24**(*) | 1.06*(*)           | 1.08*     | 1.07      |
| Pro     | 1.02           | 1.08     | 1.08      | 1.08                 | 1.12     | 1.05      | 1.04                   | 1.11*     | 1.09(*)   | 1.06               | 1.01      | 1.00      |
| Ser     | 1.49***        | 1.49***  | 1.32***   | 1.25***              | 1.24***  | 1.25***   | 1.03                   | 1.01      | 0.98      | 1.19***            | 1.27***   | 1.26***   |
| Thr     | 1.22***        | 1.17***  | 1.13*(*)  | 0.92                 | 0.98     | 1.02      | 1.06                   | 1.04      | 1.05      | 1.13***            | 1.11***   | 1.12***   |
| Tyr     | 0.97           | 0.97     | 0.93      | 0.95                 | 1.02     | 0.98      | 0.93                   | 0.88*     | 0.98      | —                  | —         | —         |
| Val     | 0.90**         | 0.86***  | 0.88*(*)  | 1.16*(*)             | 1.08     | 1.09      | 1.05                   | 1.14**(*) | 1.15**    | 1.04               | 1.09**(*) | 1.14***   |
| Overall | 1.07***        | 1.09***  | 1.07***   | 1.10***              | 1.11***  | 1.09***   | 1.05***                | 1.05***   | 1.04***   | 1.09***            | 1.11***   | 1.11***   |

Note.—AA: amino acid; 5%: sites with solvent accessibility < 5% are considered as buried; 15%: sites with solvent accessibility < 15% are considered as buried; 35%: sites with solvent accessibility < 35% are considered as buried; -: no optimal codon. Significance levels: \*\*\* $P < 0.001$ ; \*\* $P < 0.01$ ; \* $P < 0.05$ . Significance levels in parentheses disappear after correction for multiple testing.

Table S4: Odds ratio of optimal codon usage between buried and exposed sites at evolutionary conserved sites only

| AA      | <i>E. coli</i>        | <i>S. cerevisiae</i> | <i>D. melanogaster</i> | <i>M. musculus</i>  |
|---------|-----------------------|----------------------|------------------------|---------------------|
| Ala     | 0.95                  | 1.08                 | 1.09 <sup>*(*)</sup>   | —                   |
| Arg     | 0.99                  | 1.16                 | 0.92                   | 1.12 <sup>**</sup>  |
| Asn     | 1.39 <sup>***</sup>   | 1.05                 | 1.09                   | 1.17 <sup>***</sup> |
| Asp     | 1.08                  | 0.89 <sup>(*)</sup>  | 0.90 <sup>*</sup>      | 1.12 <sup>**</sup>  |
| Cys     | 0.86                  | 1.62 <sup>(*)</sup>  | 1.05                   | —                   |
| Gln     | 1.12                  | 0.99                 | 0.99                   | 1.20 <sup>***</sup> |
| Glu     | 1.07                  | 1.02                 | 1.09                   | 1.06                |
| Gly     | 1.07                  | 1.45 <sup>***</sup>  | 0.99                   | 1.10 <sup>**</sup>  |
| His     | 1.02                  | 0.97                 | 0.82 <sup>*(*)</sup>   | 1.03                |
| Ile     | 1.05                  | 1.01                 | 1.09                   | 1.05                |
| Leu     | 1.14 <sup>**(*)</sup> | 1.09                 | 1.12 <sup>*(*)</sup>   | 1.02                |
| Lys     | —                     | 1.12                 | 0.86 <sup>*(*)</sup>   | 1.10 <sup>**</sup>  |
| Phe     | 1.03                  | 1.08                 | 1.16 <sup>*</sup>      | 1.08                |
| Pro     | 1.03                  | 1.14 <sup>(*)</sup>  | 1.11 <sup>*</sup>      | 1.00                |
| Ser     | 1.49 <sup>***</sup>   | 1.16 <sup>(**)</sup> | 1.05                   | 1.22 <sup>***</sup> |
| Thr     | 1.21 <sup>***</sup>   | 0.99                 | 1.03                   | 1.14 <sup>***</sup> |
| Tyr     | 0.97                  | 1.09                 | 0.93                   | —                   |
| Val     | 0.89 <sup>*(*)</sup>  | 1.09                 | 1.24 <sup>***</sup>    | 1.08 <sup>*</sup>   |
| Overall | 1.08 <sup>***</sup>   | 1.09 <sup>***</sup>  | 1.03 <sup>**</sup>     | 1.10 <sup>***</sup> |

Note.—AA: amino acid; -: no optimal codon. Significance levels: <sup>\*\*\*</sup> $P < 0.001$ ; <sup>\*\*</sup> $P < 0.01$ ; <sup>\*</sup> $P < 0.05$ . Significance levels in parentheses disappear after correction for multiple testing.

Table S5: Odds ratio of optimal codon usage between buried and exposed sites, calculated after excluding all ribosomal proteins from the data set

| AA      | <i>E. coli</i> | <i>S. cerevisiae</i> | <i>D. melanogaster</i> | <i>M. musculus</i> |
|---------|----------------|----------------------|------------------------|--------------------|
| Ala     | 0.91*          | 1.06                 | 1.14***                | —                  |
| Arg     | 1.01           | 1.23*(*)             | 0.96                   | 1.19***            |
| Asn     | 1.36***        | 1.09                 | 1.13*(*)               | 1.17***            |
| Asp     | 1.07           | 0.87(*)              | 0.92*                  | 1.11***            |
| Cys     | 0.97           | 1.35                 | 0.92                   | —                  |
| Gln     | 1.21***        | 1.05                 | 1.04                   | 1.26***            |
| Glu     | 1.09(*)        | 1.06                 | 1.02                   | 1.06(*)            |
| Gly     | 1.06           | 1.46***              | 0.98                   | 1.11***            |
| His     | 1.03           | 0.97                 | 0.92*(*)               | 1.09(*)            |
| Ile     | 1.05           | 1.20(*)              | 1.20***                | 1.10*              |
| Leu     | 1.13**(*)      | 1.11(*)              | 1.16***                | 1.08**             |
| Lys     | —              | 1.09                 | 0.90*                  | 1.10**             |
| Phe     | 1.01           | 1.11                 | 1.19**                 | 1.07               |
| Pro     | 1.04           | 1.08                 | 1.09*                  | 0.98               |
| Ser     | 1.42***        | 1.27***              | 1.02                   | 1.25***            |
| Thr     | 1.20***        | 1.00                 | 1.07(*)                | 1.14***            |
| Tyr     | 0.88(*)        | 1.10                 | 0.93                   | —                  |
| Val     | 0.85***        | 1.12                 | 1.19***                | 1.11***            |
| Overall | 1.08***        | 1.11***              | 1.05***                | 1.12***            |

Note.—AA: amino acid; -: no optimal codon. Significance levels: \*\*\* $P < 0.001$ ; \*\* $P < 0.01$ ; \* $P < 0.05$ . Significance levels in parentheses disappear after correction for multiple testing.

Table S6: Odds ratio of optimal codon usage between structurally important and unimportant sites

| AA      | <i>E. coli</i>       |                        | <i>S. cerevisiae</i> |                        | <i>D. melanogaster</i> |                      | <i>M. musculus</i>      |                        |
|---------|----------------------|------------------------|----------------------|------------------------|------------------------|----------------------|-------------------------|------------------------|
|         | Whole                | Nonlinker              | Whole                | Nonlinker              | Whole                  | Nonlinker            | Whole                   | Nonlinker              |
| Ala     | 1.00                 | 1.03                   | 1.07                 | 1.03                   | 1.00                   | 0.99                 | —                       | —                      |
| Arg     | 0.98                 | 0.94                   | 1.13                 | 1.02                   | 1.02                   | 0.96                 | 1.14 <sup>***</sup> (*) | 1.17 <sup>**</sup> (*) |
| Asn     | 1.17 <sup>*(*)</sup> | 1.15 <sup>(*)</sup>    | 1.02                 | 1.13                   | 1.13 <sup>(*)</sup>    | 1.18 <sup>*(*)</sup> | 1.09 <sup>(*)</sup>     | 1.14 <sup>*(*)</sup>   |
| Asp     | 1.01                 | 1.01                   | 0.98                 | 0.95                   | 1.00                   | 1.03                 | 1.02                    | 1.02                   |
| Cys     | 0.84                 | 0.92                   | 1.49 <sup>*(*)</sup> | 1.31                   | 1.22 <sup>(*)</sup>    | 1.13                 | —                       | —                      |
| Gln     | 1.12 <sup>(*)</sup>  | 1.04                   | 1.22 <sup>(*)</sup>  | 1.28 <sup>(*)</sup>    | 1.01                   | 0.92                 | 1.03                    | 1.07                   |
| Glu     | 1.13 <sup>*(*)</sup> | 1.11                   | 1.15 <sup>(*)</sup>  | 1.15                   | 1.09 <sup>(*)</sup>    | 1.06                 | 1.00                    | 1.03                   |
| Gly     | 0.99                 | 0.97                   | 1.33 <sup>***</sup>  | 1.21 <sup>(**)</sup>   | 1.04                   | 1.06                 | 1.06                    | 1.03                   |
| His     | 0.97                 | 1.02                   | 1.09                 | 1.07                   | 1.06                   | 1.05                 | 1.02                    | 1.03                   |
| Ile     | 1.00                 | 1.00                   | 1.10                 | 1.06                   | 1.06                   | 1.11                 | 1.13 <sup>**</sup> (*)  | 1.15 <sup>**</sup>     |
| Leu     | 1.04                 | 1.00                   | 1.16 <sup>*(*)</sup> | 1.26 <sup>**</sup> (*) | 1.06                   | 1.12 <sup>*(*)</sup> | 1.07 <sup>*</sup>       | 1.08 <sup>(*)</sup>    |
| Lys     | —                    | —                      | 1.01                 | 0.96                   | 0.92                   | 0.97                 | 1.11 <sup>**</sup>      | 1.13 <sup>**</sup>     |
| Phe     | 1.14                 | 1.03                   | 1.09                 | 1.09                   | 1.18 <sup>(*)</sup>    | 1.07                 | 1.14 <sup>*(*)</sup>    | 1.18 <sup>**</sup>     |
| Pro     | 1.03                 | 1.02                   | 1.10                 | 1.06                   | 1.01                   | 0.91                 | 1.05                    | 1.09                   |
| Ser     | 1.30 <sup>***</sup>  | 1.26 <sup>**</sup> (*) | 1.14 <sup>(*)</sup>  | 1.13                   | 1.04                   | 1.06                 | 1.10 <sup>*(*)</sup>    | 1.12 <sup>*</sup>      |
| Thr     | 1.13 <sup>(*)</sup>  | 1.15 <sup>(*)</sup>    | 0.93                 | 0.93                   | 1.09 <sup>(*)</sup>    | 1.02                 | 1.05                    | 1.02                   |
| Tyr     | 0.88                 | 0.87                   | 0.96                 | 0.97                   | 0.97                   | 0.97                 | —                       | —                      |
| Val     | 0.90 <sup>*(*)</sup> | 0.92 <sup>(*)</sup>    | 1.07                 | 1.00                   | 1.24 <sup>***</sup>    | 1.16 <sup>*(*)</sup> | 1.07 <sup>*</sup>       | 1.08 <sup>(*)</sup>    |
| Overall | 1.04 <sup>**</sup>   | 1.03                   | 1.09 <sup>***</sup>  | 1.07 <sup>***</sup>    | 1.05 <sup>***</sup>    | 1.04 <sup>***</sup>  | 1.07 <sup>***</sup>     | 1.08 <sup>***</sup>    |

Note.—AA: amino acid; Whole: odds ratio for whole protein sequences; Nonlinker: odds ratio for sequences without domain boundary region; -: no optimal codon. Significance levels: <sup>\*\*\*</sup> $P < 0.001$ ; <sup>\*\*</sup> $P < 0.01$ ; <sup>\*</sup> $P < 0.05$ . Significance levels in parentheses disappear after correction for multiple testing.

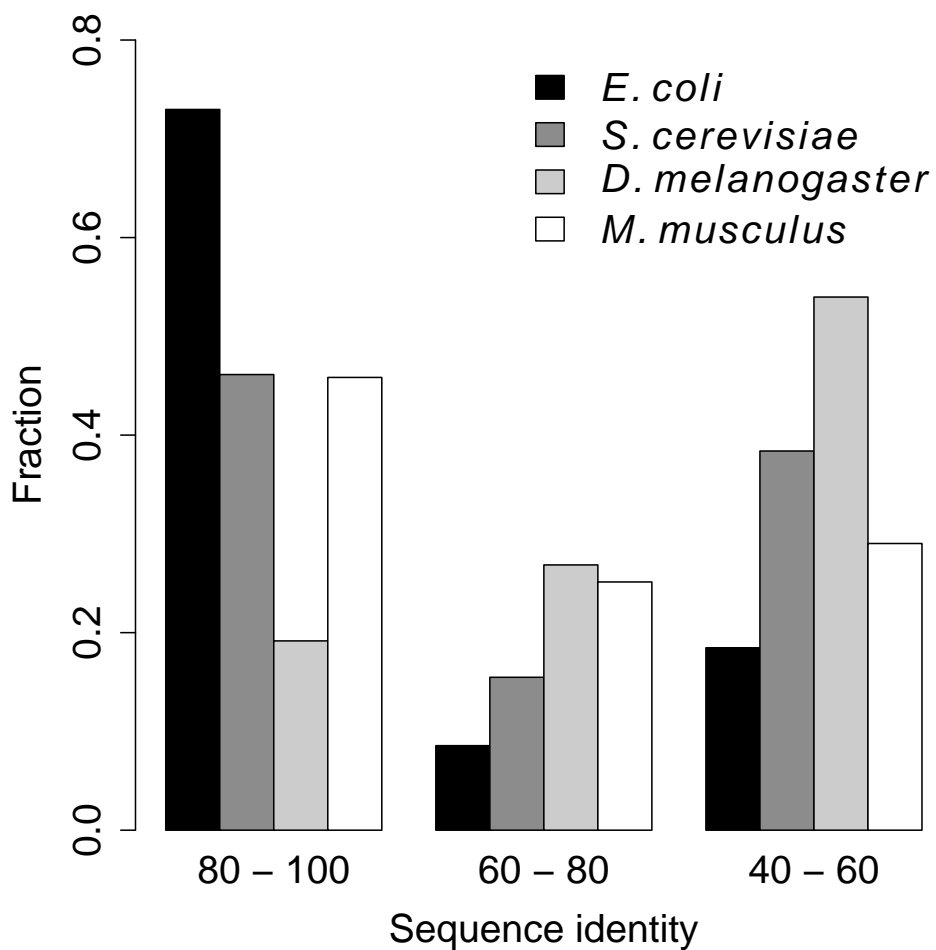

Figure S1: Distribution of sequence identities between gene sequences and associated sequences of protein crystal structures for each species. *E. coli* has the largest fraction of sequences with closely-related crystal structures, while fly has the smallest fraction.

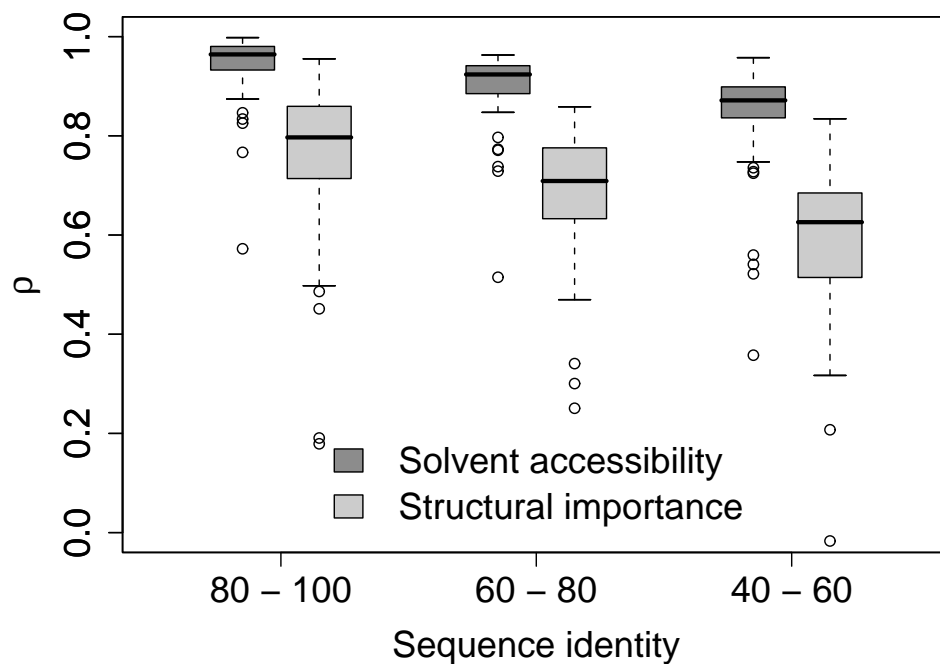

Figure S2: Conservation of solvent accessibility and structural importance as a function of sequence diversity. In each sequence identity group, for each quantity (solvent accessibility or structural importance), and for each representative protein, we calculated the Spearman correlation  $\rho$  of the quantity between the homologous sites of the representative protein and those of its homolog. The box plots show the distribution of  $\rho$  values in each sequence-identity group and for each quantity.



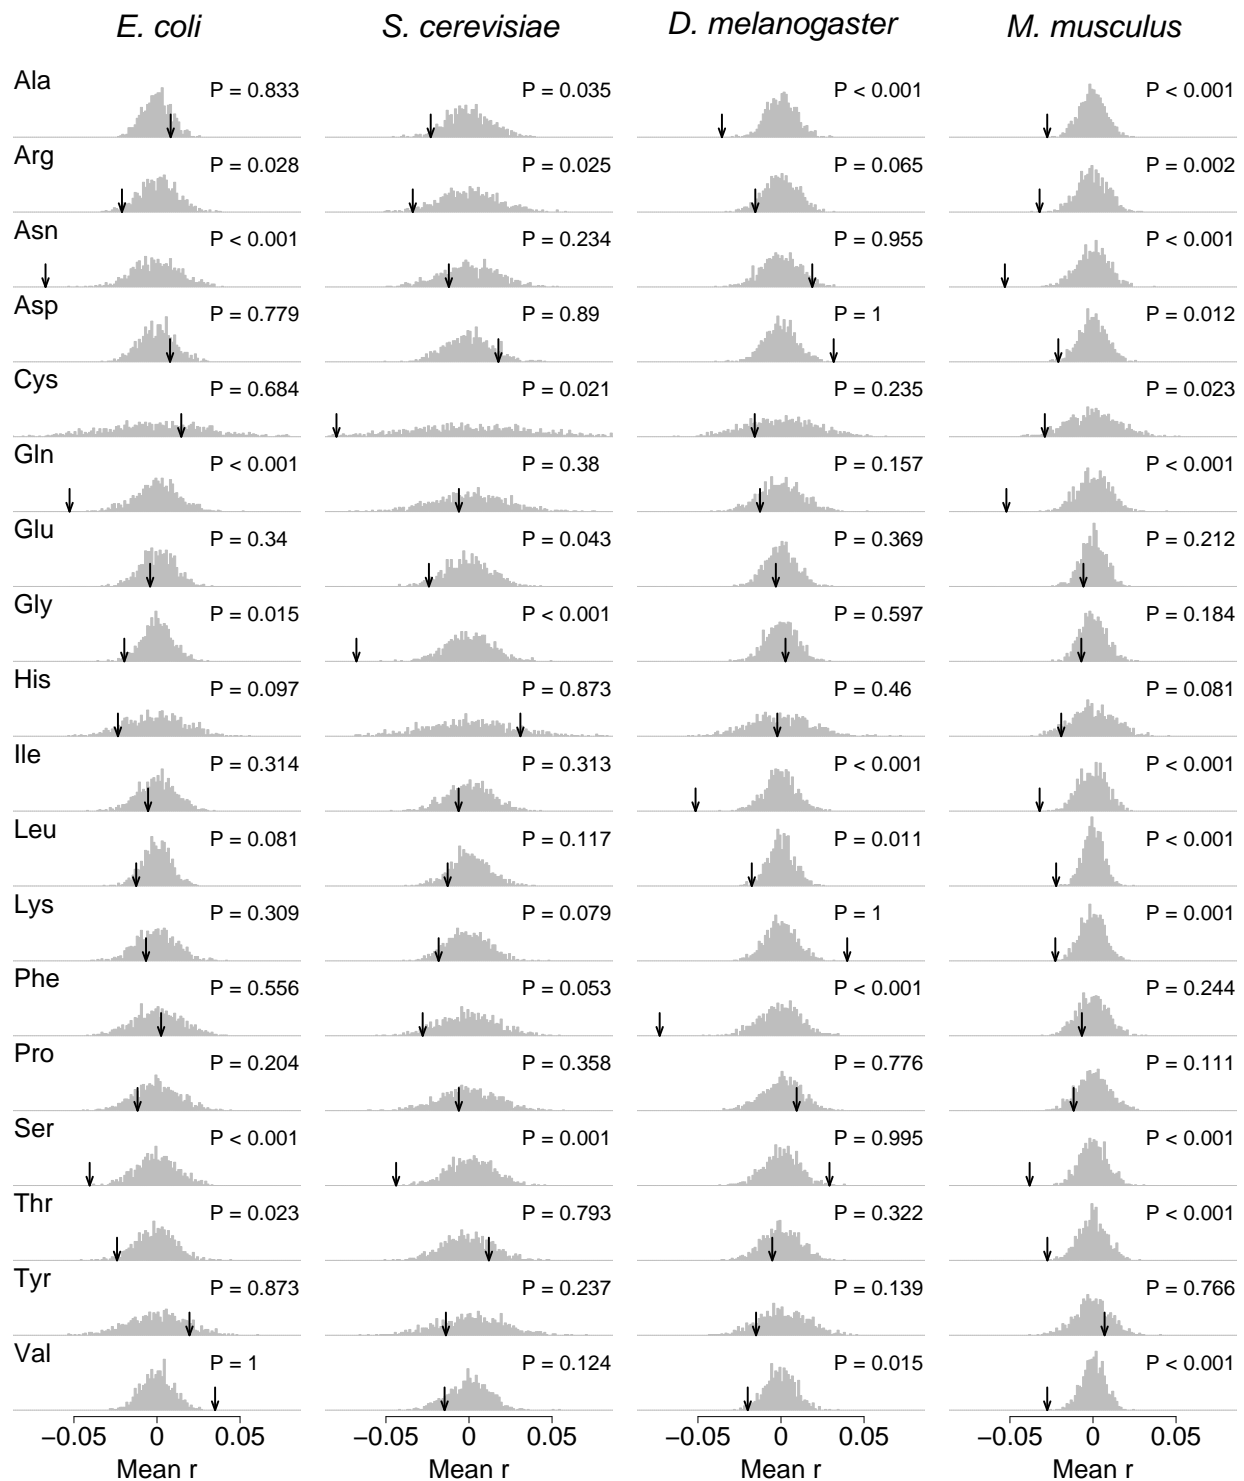

Figure S3: Test for association between codon optimality and solvent accessibility, separately for each amino acid. The black arrows indicate the mean correlation coefficient between the two quantities over all genes. The gray histograms show the sampling distribution of the same quantity under the null hypothesis of no association.  $P$  values are one-sided and not corrected for multiple testing.

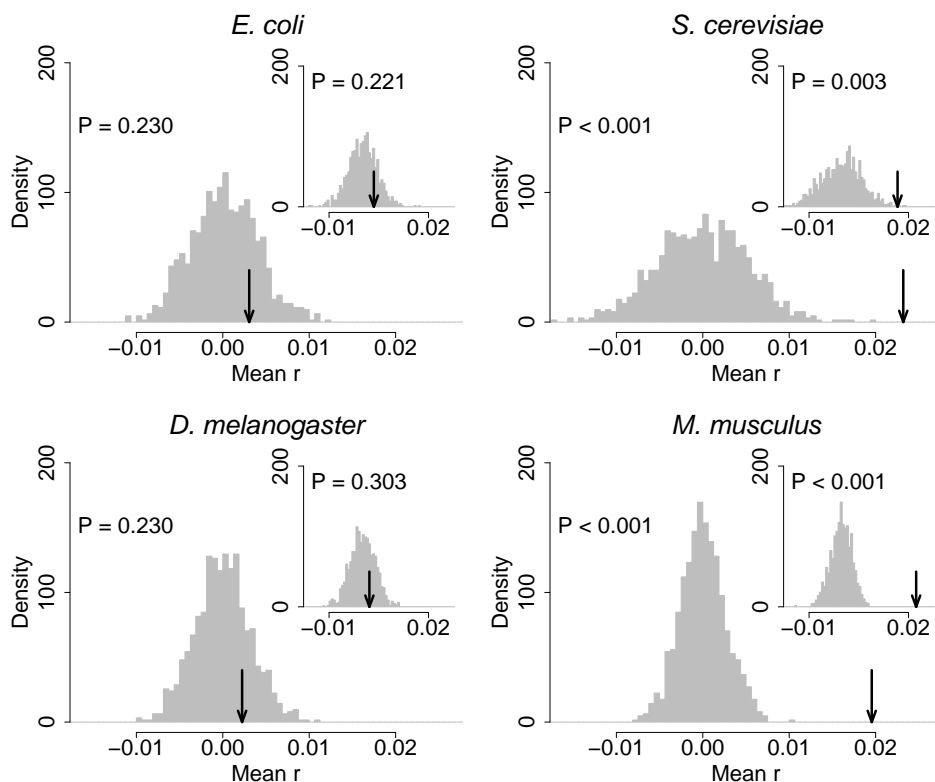

Figure S4: Test for association between codon optimality and structural importance. The black arrows indicate the mean correlation coefficient between these two quantities over all amino acids and all genes. The gray histograms show the sampling distribution of the same quantity under the null hypothesis of no association. The main figure of each panel shows the results for complete genes, and the inset shows the results when interdomain linker regions are excluded.

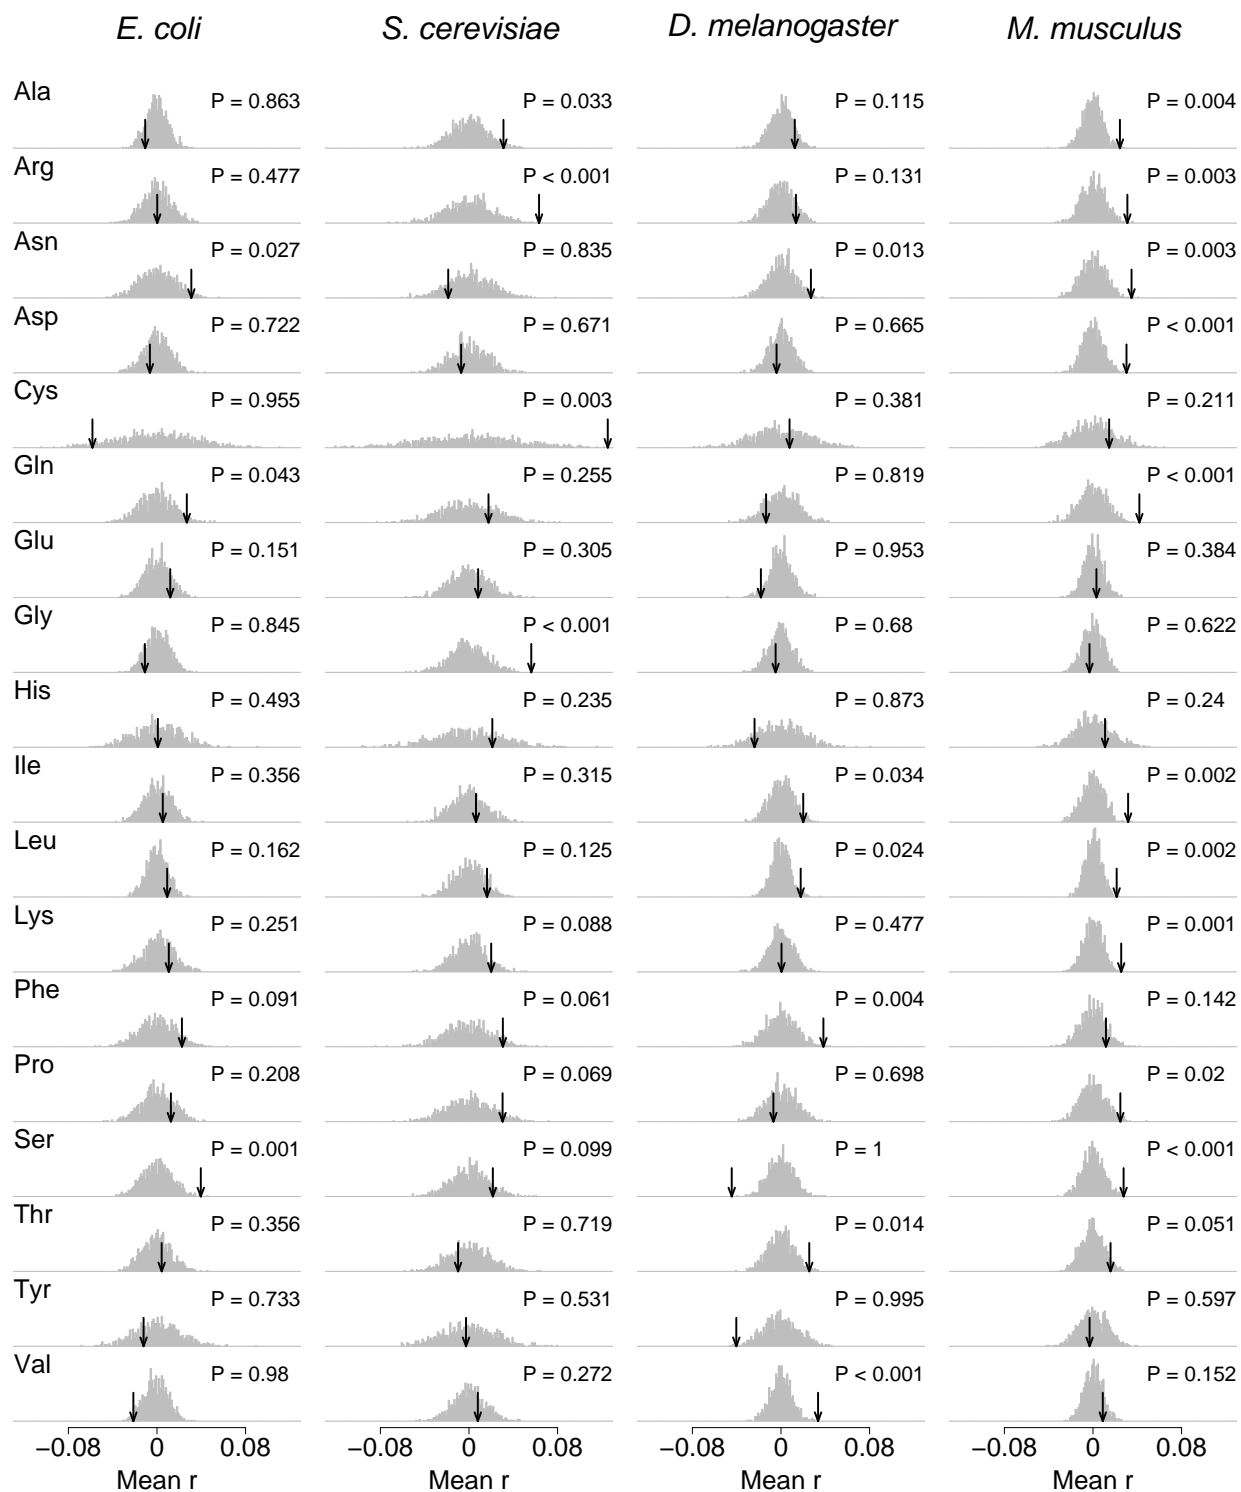

Figure S5: Test for association between codon optimality and structural importance, separately for each amino acid. The black arrows indicate the mean correlation coefficient between the two quantities over all genes. The gray histograms show the sampling distribution of the same quantity under the null hypothesis of no association.  $P$  values are one-sided and not corrected for multiple testing.

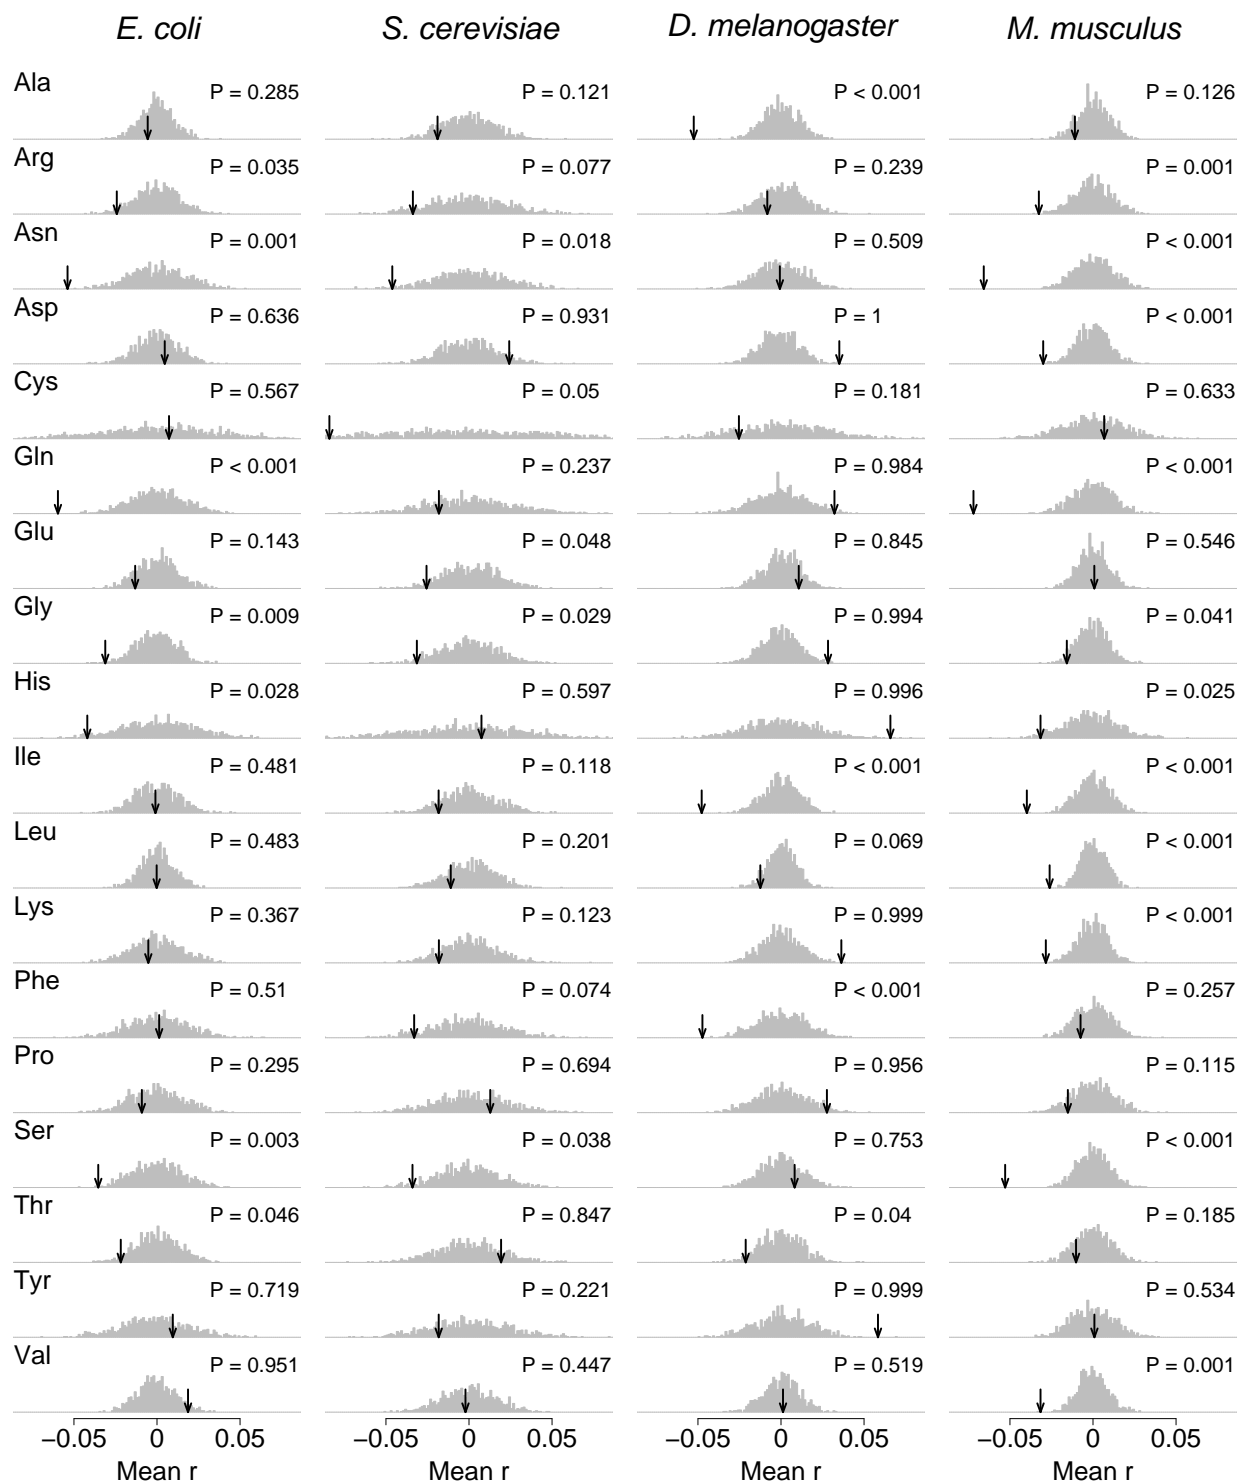

Figure S6: Test for association between codon optimality and solvent accessibility, separately for each amino acid and excluding inter-domain linker regions. The black arrows indicate the mean correlation coefficient between the two quantities over all genes. The gray histograms shows the sampling distribution of the same quantity under the null hypothesis of no association.  $P$  values are one-sided and not corrected for multiple testing.

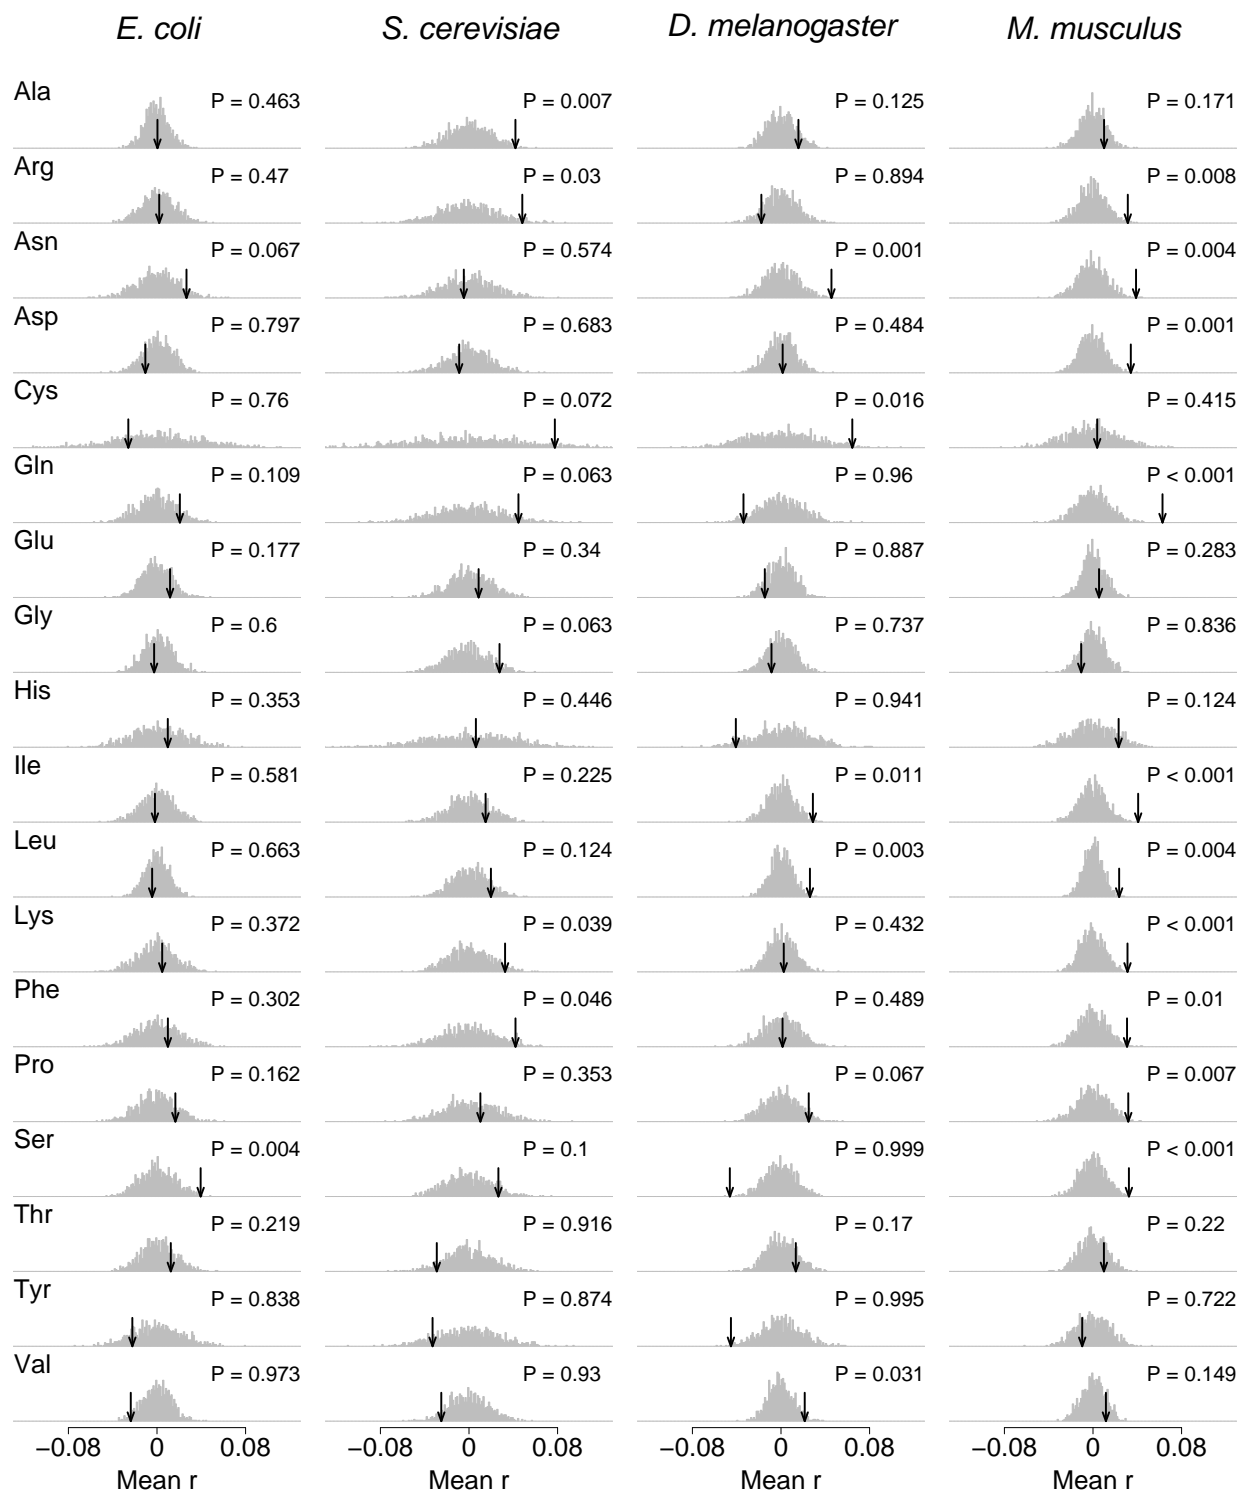

Figure S7: Test for association between codon optimality and structural importance, separately for each amino acid and excluding inter-domain linker regions. The black arrows indicate the mean correlation coefficient between the two quantities over all genes. The gray histograms show the sampling distribution of the same quantity under the null hypothesis of no association.  $P$  values are one-sided and not corrected for multiple testing.
